# Supplementary material
Source: PubMed Central journal article supplement (PMC5528639)
Supplement: MOL2-8-533-s003.pdf [file MOL2-8-533-s003.pdf]

**E6 11**

**PAR 3**

**nuclei**

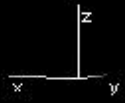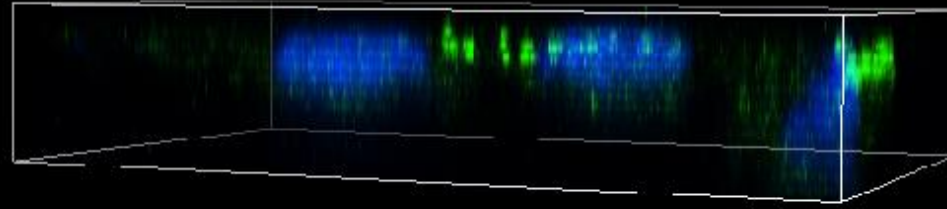

Width: 38.19  $\mu\text{m}$  Height: 23.76  $\mu\text{m}$  Depth: 6.60  $\mu\text{m}$

**E6 18**

**PAR 3**

**nuclei**

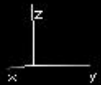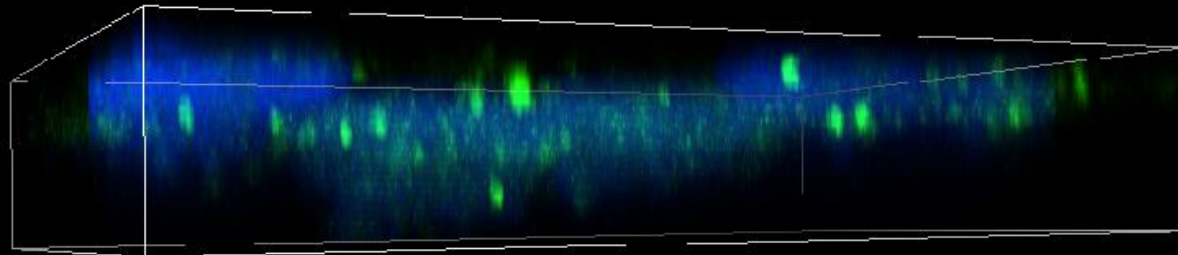

Width: 23.55  $\mu\text{m}$  Height: 35.70  $\mu\text{m}$  Depth: 6.00  $\mu\text{m}$

**FigS2 Facciuto**
