# Supplementary material
Source: PubMed Central journal article supplement (PMC5528639)

PAR 3

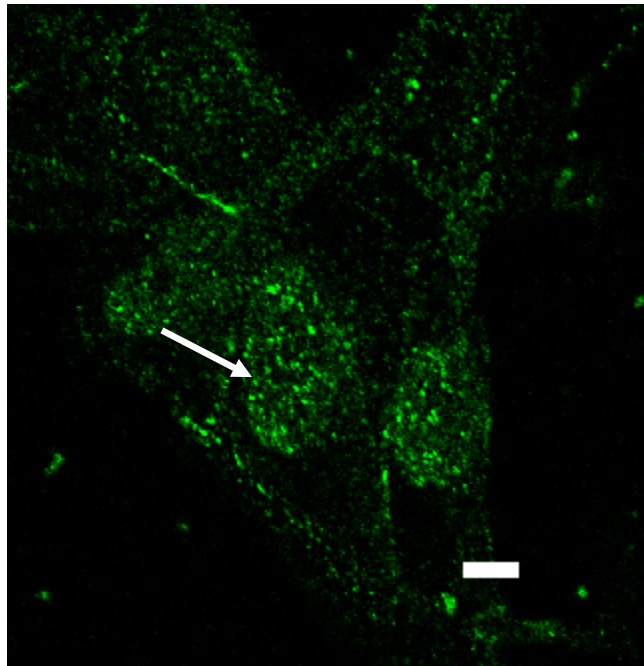

NUCLEI

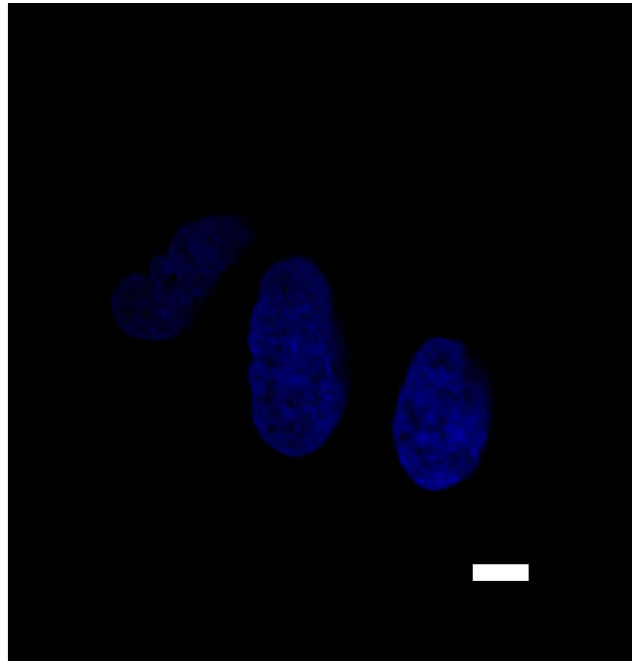

MERGE

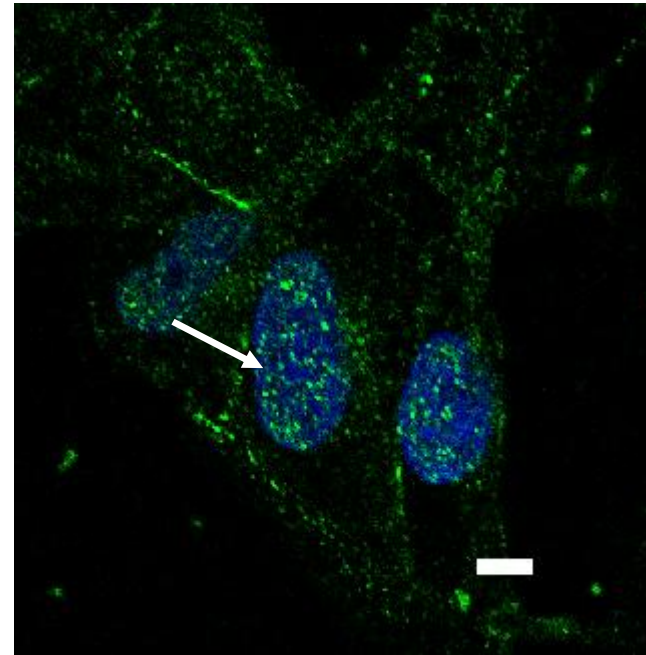

Fig S1 Facciu

Supplement: MOL2-8-533-s002.pdf [file MOL2-8-533-s002.pdf]

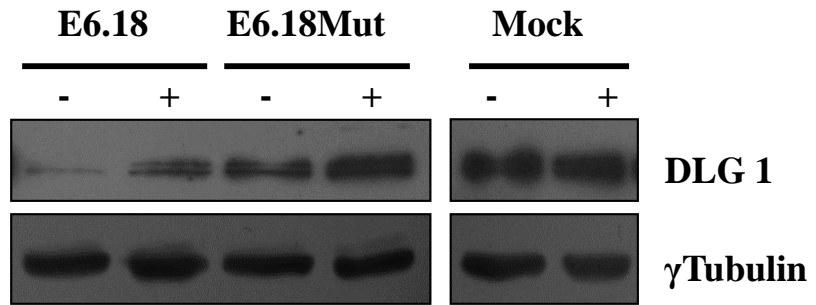

Fig S3

Supplement: MOL2-8-533-s004.pdf [file MOL2-8-533-s004.pdf]
